# Supplementary material for: Cobalt and nitrogen co-embedded onion-like mesoporous carbon vesicles as efficient catalysts for oxygen reduction reaction
Source: Royal Society of Chemistry journal article supplement (doi:10.1039/c4ta01078g), 2014-05-21
Supplement: c4ta01078g1.pdf [file c4ta01078g1.pdf]

## Supporting Information

### Cobalt and Nitrogen Co-embedded Onion-like Mesoporous Carbon Vesicles as Efficient Catalysts for Oxygen Reduction Reaction in Alkaline Solution

Mian Li, Xiangjie Bo\*, Yufan Zhang, Ce Han, Anacllet Nsabimana, and Liping Guo\*

*Faculty of Chemistry, Northeast Normal University, Changchun, 130024, P. R. China*

E-mail address: [baoxj133@nenu.edu.cn](mailto:baoxj133@nenu.edu.cn) (X. Bo), [guolp078@nenu.edu.cn](mailto:guolp078@nenu.edu.cn) (L.-P. Guo).

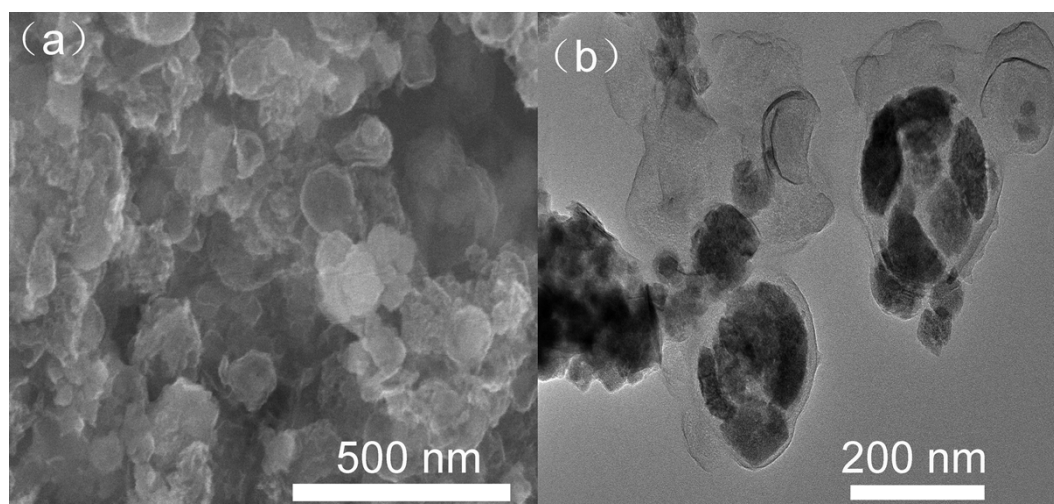

**Fig. S1.** (a) SEM and (b) TEM images of the Co<sub>20</sub>-NMCV sample.

**Table S1** Textural properties and atomic concentrations of the C, O, Co and N elements for the NMCV, Co5-NMCV, Co10-NMCV, and Co20-NMCV samples got from the N<sub>2</sub> physisorption isotherm curves and XPS analyses, respectively.

| Sample    | S <sub>BET</sub> <sup>a</sup><br>(m <sup>2</sup> g <sup>-1</sup> ) | V <sub>t</sub> <sup>b</sup><br>(m <sup>3</sup> g <sup>-1</sup> ) | C <sup>c</sup><br>(at.%) | O <sup>c</sup><br>(at.%) | Co <sup>c</sup><br>(at.%) | N <sup>c</sup><br>(at.%) |
|-----------|--------------------------------------------------------------------|------------------------------------------------------------------|--------------------------|--------------------------|---------------------------|--------------------------|
| NMCV      | 569.05                                                             | 0.69                                                             | 84.20                    | 14.68                    | -                         | 1.13                     |
| Co5-NMCV  | 340.75                                                             | 0.53                                                             | 91.18                    | 7.37                     | 0.26                      | 1.18                     |
| Co10-NMCV | 308.44                                                             | 0.52                                                             | 84.66                    | 13.70                    | 0.41                      | 1.23                     |
| Co20-NMCV | 79.95                                                              | 0.14                                                             | 86.90                    | 11.75                    | 0.50                      | 0.85                     |

<sup>a</sup> Total BET surface area got from Fig. 2a;

<sup>b</sup> Total pore volume got from Fig. 2a;

<sup>c</sup> Getting from XPS analysis in Fig. 2c.

**Table S2.** The current density ( $j$ , mA cm<sup>-2</sup>, read at -0.5 V vs. Ag/AgCl in the LSV curves),  $E_{\text{onset}}$  value (V vs. Ag/AgCl), the shift values of the  $j$  ( $\Delta j$ ) and  $E_{\text{onset}}$  values ( $\Delta E_{\text{onset}}$ ), and the % loss of the  $j$  and  $E_{\text{onset}}$  values for the Co10-NMCV and Pt/C catalysts before and after different potential cycles.

| Sample        | Pulse potential<br>cycles | $j$<br>(mA cm <sup>-2</sup> ) | $\Delta j$<br>(mA cm <sup>-2</sup> ) | % loss<br>of $j$ | $E_{\text{onset}}$<br>(V) | $\Delta E_{\text{onset}}$<br>(mV) | % loss<br>Of $\Delta E_{\text{onset}}$ |
|---------------|---------------------------|-------------------------------|--------------------------------------|------------------|---------------------------|-----------------------------------|----------------------------------------|
| Co10-<br>NMCV | 0                         | -3.909                        | -                                    | -                | -0.131                    | -                                 | -                                      |
|               | 2000                      | -3.699                        | 0.21                                 | -5.21 %          | -0.141                    | 10                                | -7.61 %                                |
|               | 4000                      | -3.662                        | 0.25                                 | -6.32 %          | -0.149                    | 18                                | -13.74 %                               |
|               | 6000                      | -3.601                        | 0.31                                 | -7.88 %          | -0.153                    | 24                                | -18.32 %                               |
| Pt/C          | 0                         | -4.106                        | -                                    | -                | -0.078                    | -                                 | -                                      |
|               | 2000                      | -3.749                        | 0.36                                 | -8.69 %          | -0.090                    | 12                                | -15.38 %                               |
|               | 4000                      | -3.337                        | 0.77                                 | -18.73 %         | -0.106                    | 28                                | -35.89 %                               |
|               | 6000                      | -3.047                        | 1.06                                 | -25.79 %         | -0.118                    | 40                                | -51.28 %                               |

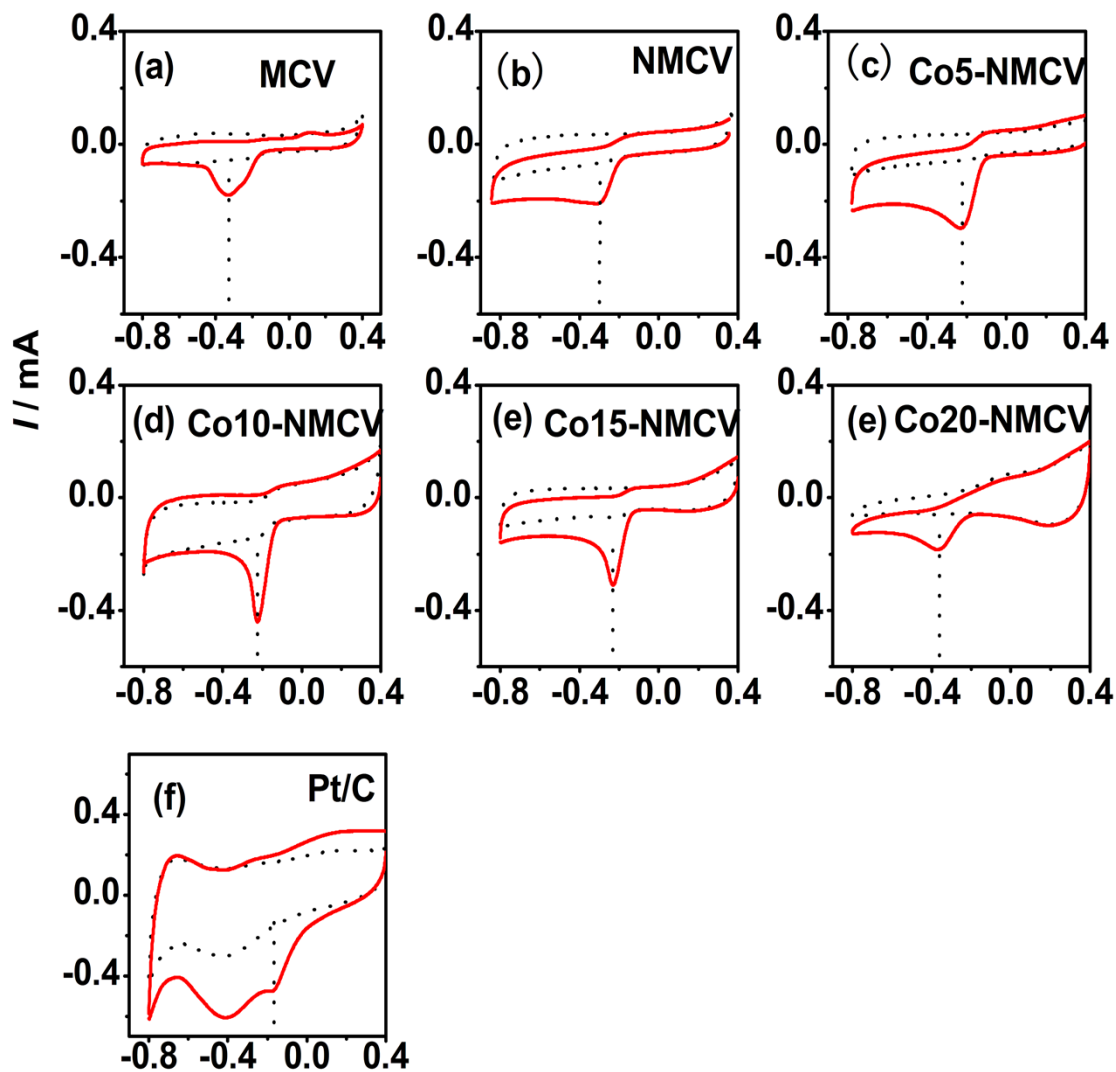

**Fig. S2.** Cyclic voltammograms (CVs) of the MCV, NMCV, Co5-NMCV, Co10-NMCV, Co10-NMCV, Co20-NMCV and Pt/C catalysts in 0.1 M KOH electrolyte (scan rate: 50 mV s<sup>-1</sup>, catalyst loading: 152.9 mg cm<sup>-2</sup>) saturated with N<sub>2</sub> (dot line) or O<sub>2</sub> (solid line).

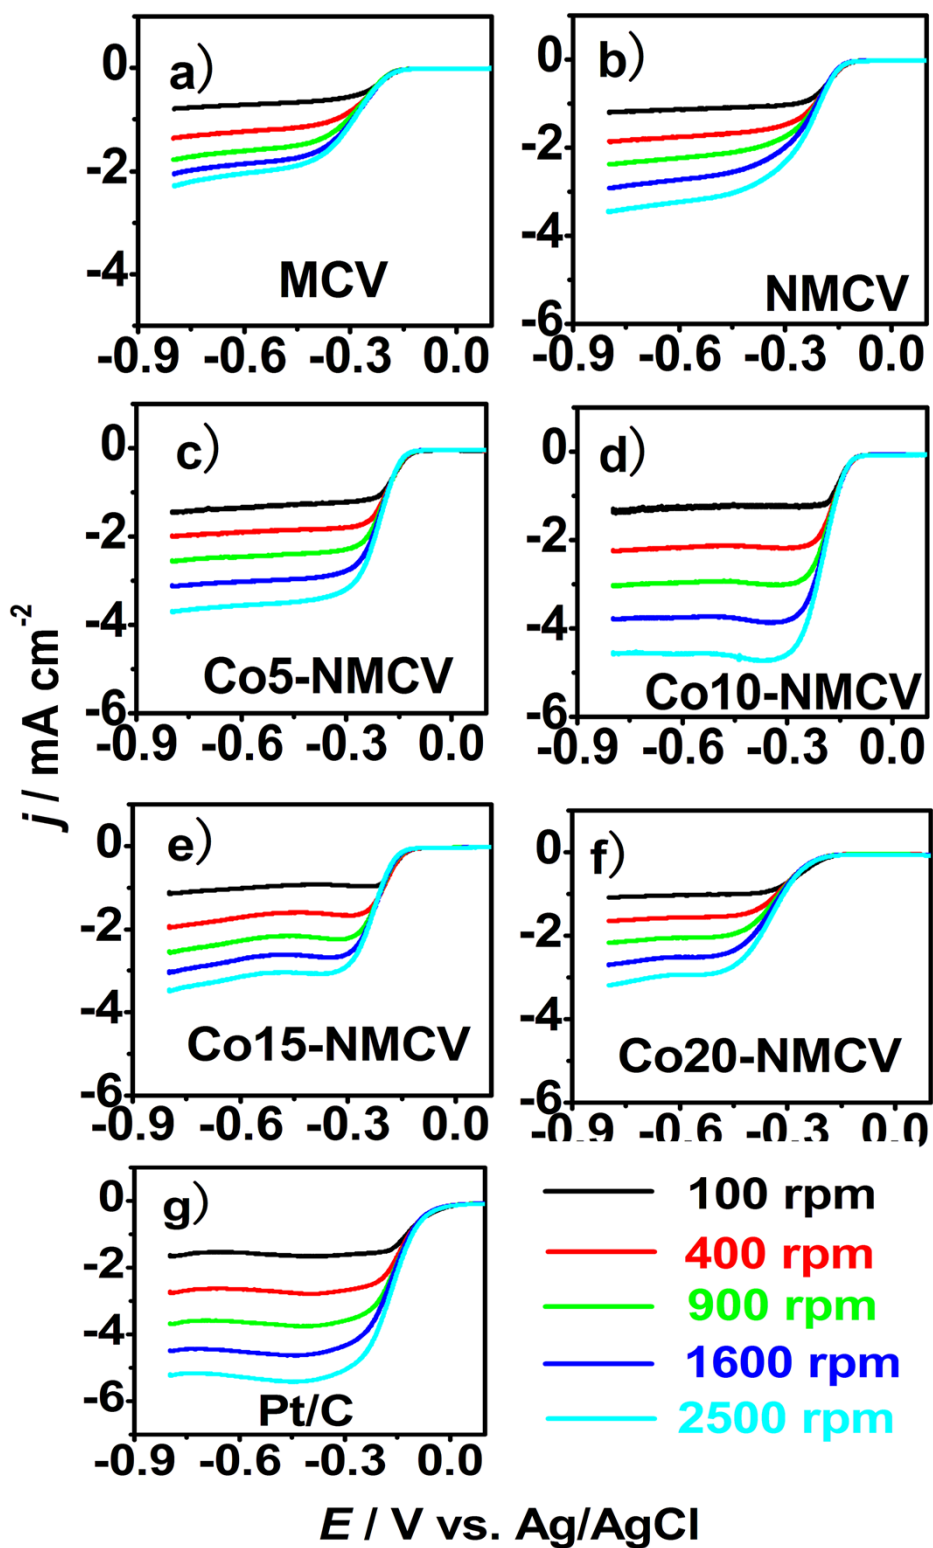

**Fig. S3.** RDE voltammograms of various catalysts in 0.1 M KOH electrolyte saturated with O<sub>2</sub> (scan rate 5 mV s<sup>-1</sup>, catalyst loading 152.9 mg cm<sup>-2</sup>) at different rotation rates from 100 to 2500 rpm.

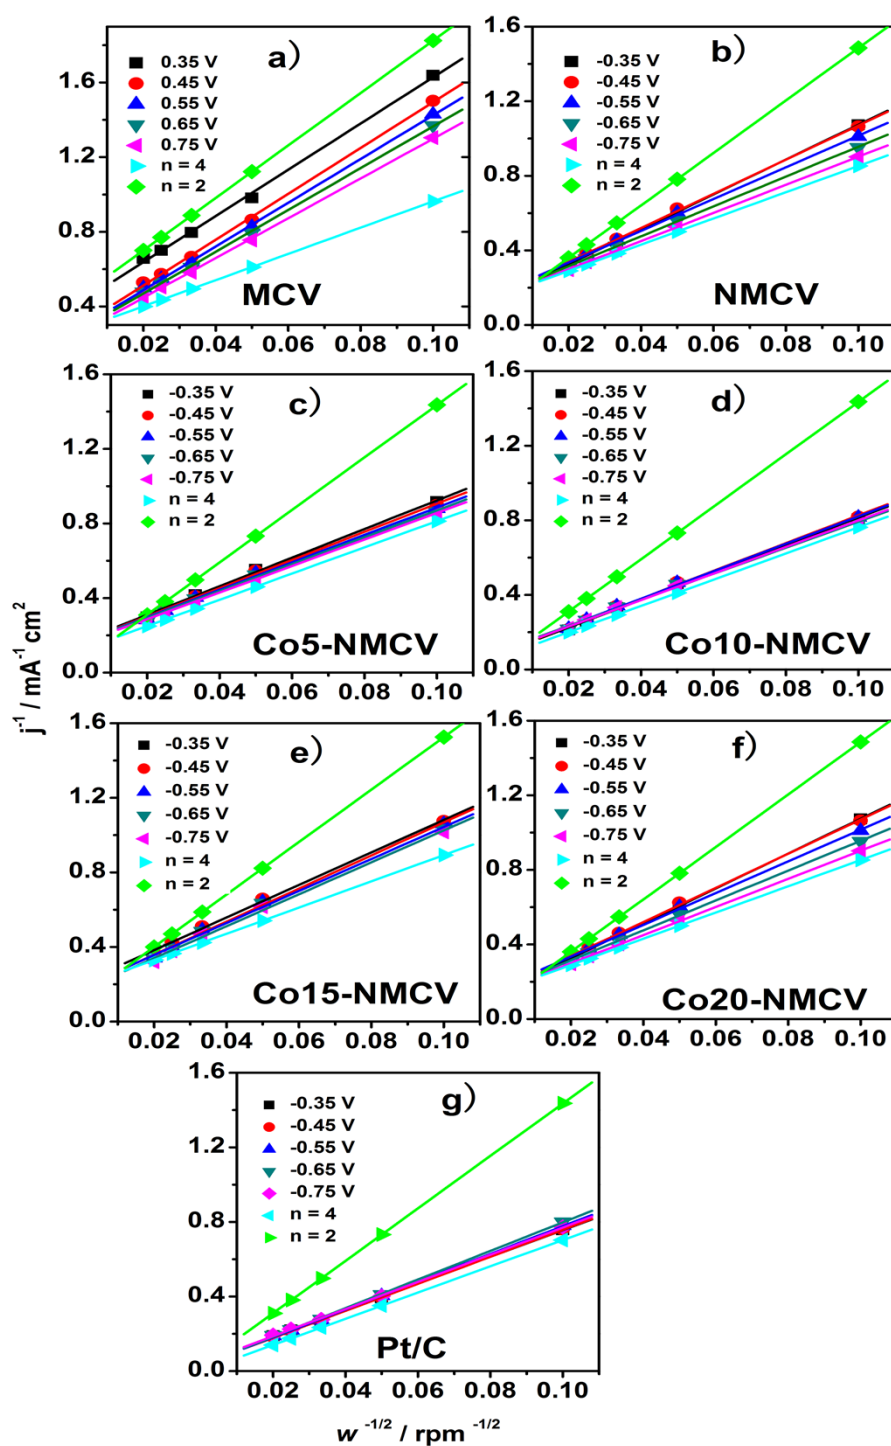

**Fig. S4.** K-L plots derived from the RDE voltammograms of various catalysts in 0.1 M KOH electrolyte saturated with  $\text{O}_2$  (scan rate:  $5 \text{ mV s}^{-1}$ , catalyst loading:  $152.9 \text{ mg cm}^{-2}$ ) at different potentials from -0.75 to -0.35 V vs. Ag/AgCl.

**Table S3.** Heterocyclic C, N, and Co components of the NMCV, Co5-NMCV, Co10-NMCV, and Co20-NMCV samples recorded from the XPS C1s, N1s, and Co2p<sub>3/2</sub> spectra shown in Fig. 8.

| Peak                | Component | Assignment                                   | Binding Energy (eV) | Relative Quantity (at.%) |          |           |           |
|---------------------|-----------|----------------------------------------------|---------------------|--------------------------|----------|-----------|-----------|
|                     |           |                                              |                     | NMCV                     | Co5-NMCV | Co10-NMCV | Co20-NMCV |
| C1s                 | C1        | C-C sp <sup>2</sup>                          | 284.5               | 33.14                    | 46.89    | 33.54     | 41.66     |
|                     | C2        | C-C sp <sup>3</sup> /<br>C-N sp <sup>2</sup> | 285.4               | 20.76                    | 19.34    | 21.72     | 18.20     |
|                     | C3        | C-O                                          | 286                 | 9.31                     | 9.78     | 8.20      | 11.22     |
| N1s                 | N1        | Pyridinic-N                                  | 398.3               | 0.354                    | 0.405    | 0.507     | 0.209     |
|                     | N2        | Pyrrolic-N                                   | 400.4               | 0.352                    | 0.202    | 0.199     | 0.366     |
|                     | N3        | Quaternary-N                                 | 401.3               | 0.155                    | 0.471    | 0.473     | 0.119     |
|                     | N4        | Oxidized-N                                   | 402-405             | 0.166                    | 0.079    | -         | 0.054     |
| Co2p <sub>3/2</sub> | Co1       | Co (0)                                       | 778.4               |                          | 0.014    | 0.003     | 0.067     |
|                     | Co2       | Co <sub>x</sub> O <sub>y</sub>               | 779.6               |                          | 0.031    | 0.081     | 0.005     |
|                     | Co3       | Co-N-C                                       | 780.3               | -                        | 0.025    | 0.095     | 0.090     |
|                     | Co4       | Co-N                                         | 781.5               |                          | 0.079    | 0.099     | 0.096     |
|                     | Co5       | Co (II) nitrate                              | 783.0               |                          | 0.036    | 0.070     | 0.113     |
|                     | Co6       | Satellites                                   | 784-788             |                          | 0.066    | 0.068     | 0.132     |
